# Supplementary material for: Absence of claudin-3 does not alter intestinal absorption of phosphate in mice
Source: PubMed Central journal article supplement (PMC11381482; doi:10.1007/s00424-024-02998-x), 2024-08-08

**Supplementary Table 1. Primers and FAM/TAMRA labelled probes used for quantitative real-time PCR analysis.**

|                                   |                                                                                                                                                     |
|-----------------------------------|-----------------------------------------------------------------------------------------------------------------------------------------------------|
| <b>Claudin-12</b>                 | FW: GCC TGA CTG GTT CCC TGA AG<br>RV: CAG AGA TAA TCT GGA CCG GCT                                                                                   |
| <b>TRPV5</b>                      | FW: CGT TGG TTC TTA CGG GTT GAA C<br>RV: GTT TGG AGA ACC ACA GAG CCT CTA<br>Probe: TGT TTC TCA GAT AGC TGC TCT TGT ACT TCC TCT TTG T                |
| <b>TRPV6</b>                      | FW: TTC TGC AGA TGG TTC CAC AG<br>RV: TCT CTG GTG CAC CTC ACA TC<br>Probe: CAG CAG AAG AGG ATC TGG GAA TC                                           |
| <b>NHE3</b>                       | FW: CAC ACC CCG CCC ATC TAC T<br>RV: CCA GGC ATA CAG CAC TGA CAT T<br>Probe: TGG AGG CGT CTG TCT CAT ATT TCT TGA GGG                                |
| <b>ATP2b4</b>                     | FW: GGG CAG TGA GTG AGA ATC AGA<br>RV: AGG TGT GGA TGG AGC TAC GA                                                                                   |
| <b>Cyp24a1</b>                    | FW: CCA GCG GCT AGA GAT CAA AC<br>RV: CAC GGG CTT CAT GAG TTT CT<br>Probe: TAC GGG CTG ATG ATC CTG GAA GGAC                                         |
| <b>Cyp27b1</b>                    | FW: CCG ACC CTA CAC TTG TGG AG<br>RV: ATT CTT CAC CAT CCG CCG TT<br>Probe: TCT CAT CAT GGG CAG AGC ACC GTC                                          |
| <b>VDR</b>                        | FW: GGA TCT GTG GAG TGT GTG GA<br>RV: CAT GCT CCG CCT GAA GAA AC<br>Probe: TAT GAC CTG TGA AGG CTG CA                                               |
| <b>HPRT</b>                       | FW: TTA TCA GAC TGA AGA GCT ACT GTA ATG ATC<br>RV: TTA CCA GTG TCA ATT ATA TCT TCA ACA ATC<br>Probe: TGA GAG ATC ATC TCC ACC AAT AAC TTT TAT GTC CC |
| <b>Claudin-3<br/>(for RT-PCR)</b> | FW: GTA CAA GAC GAG ACG GCC AA<br>RV: GGG CAC CAA CGG GTT ATA GA                                                                                    |

## Supplementary figure 1

### A) Expression of *Cldn3* mRNA (RT-PCR) in intestinal segments of WT mice

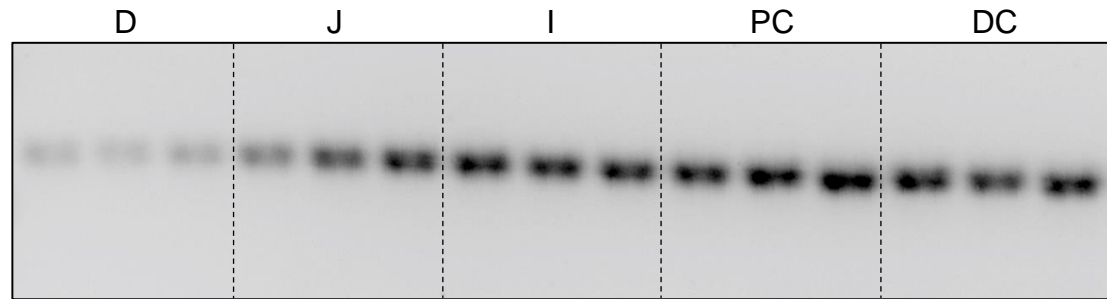

### B) Expression of *Cldn3* protein in various intestinal segments of WT and *Cldn3* deficient mice

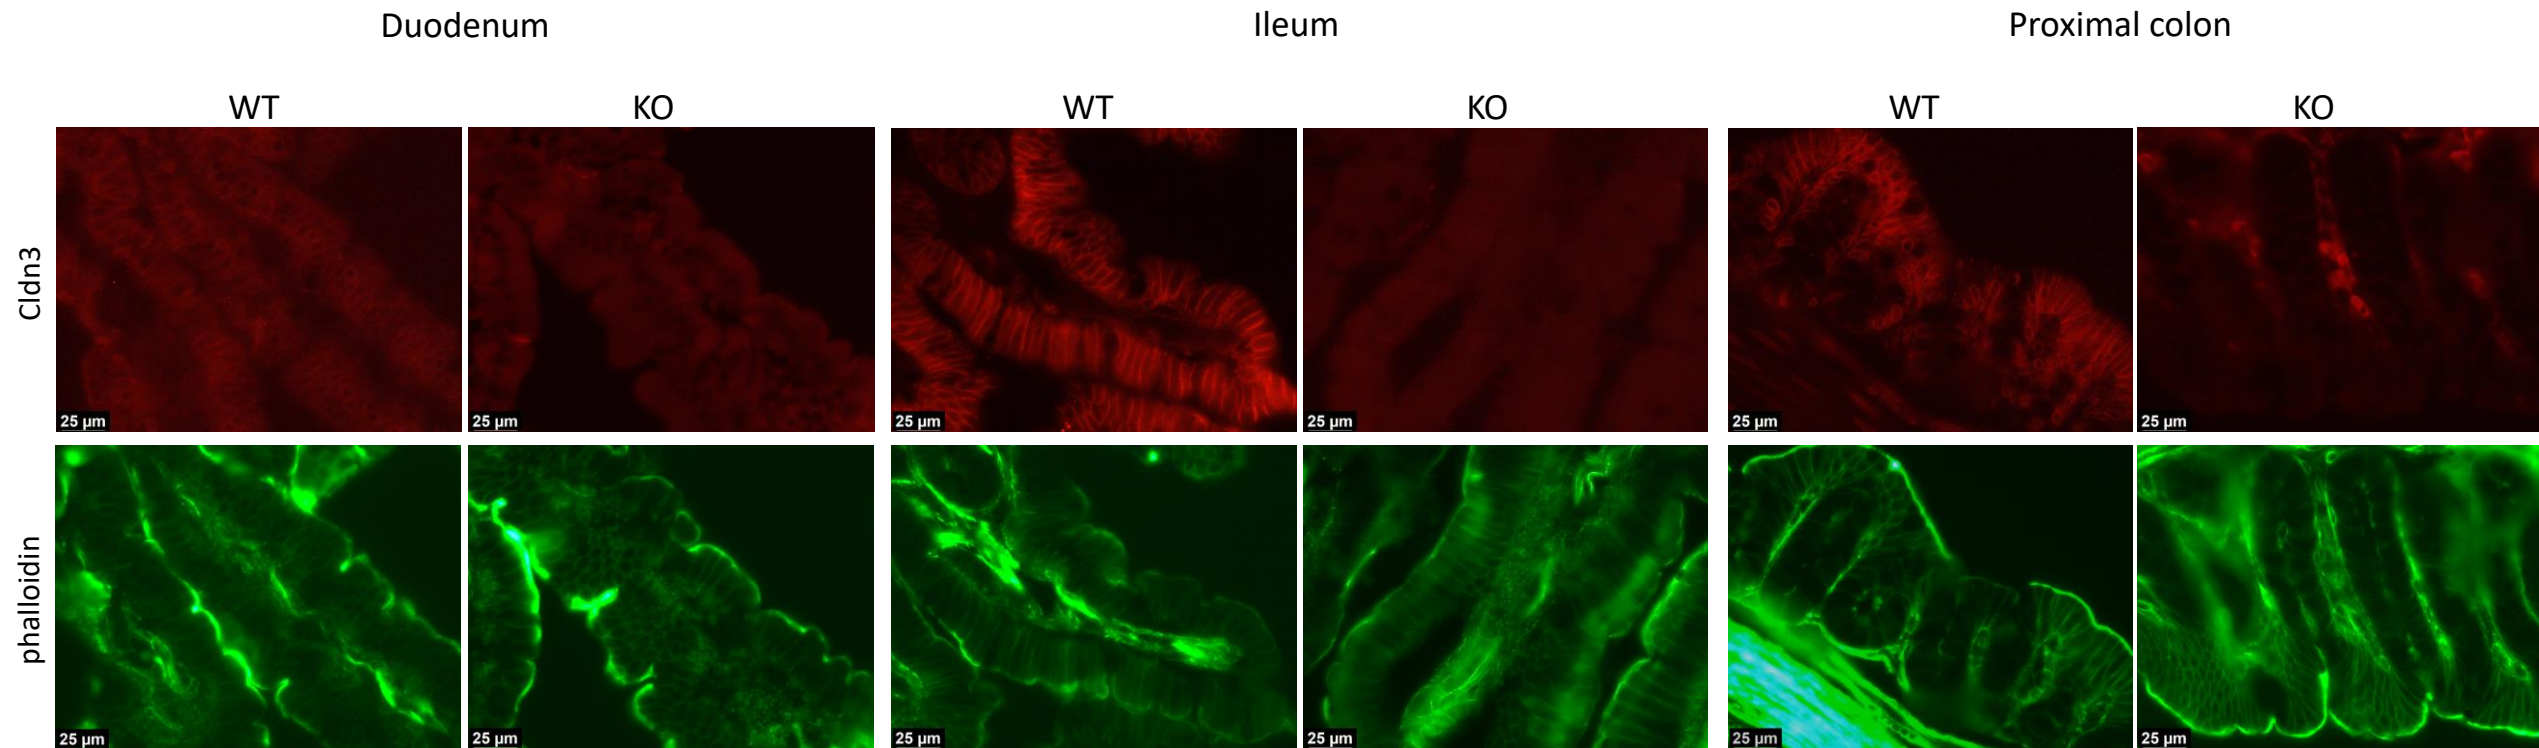

Supplementary figure 2 – mineral parameters under baseline conditions

□ WT  
■ KO

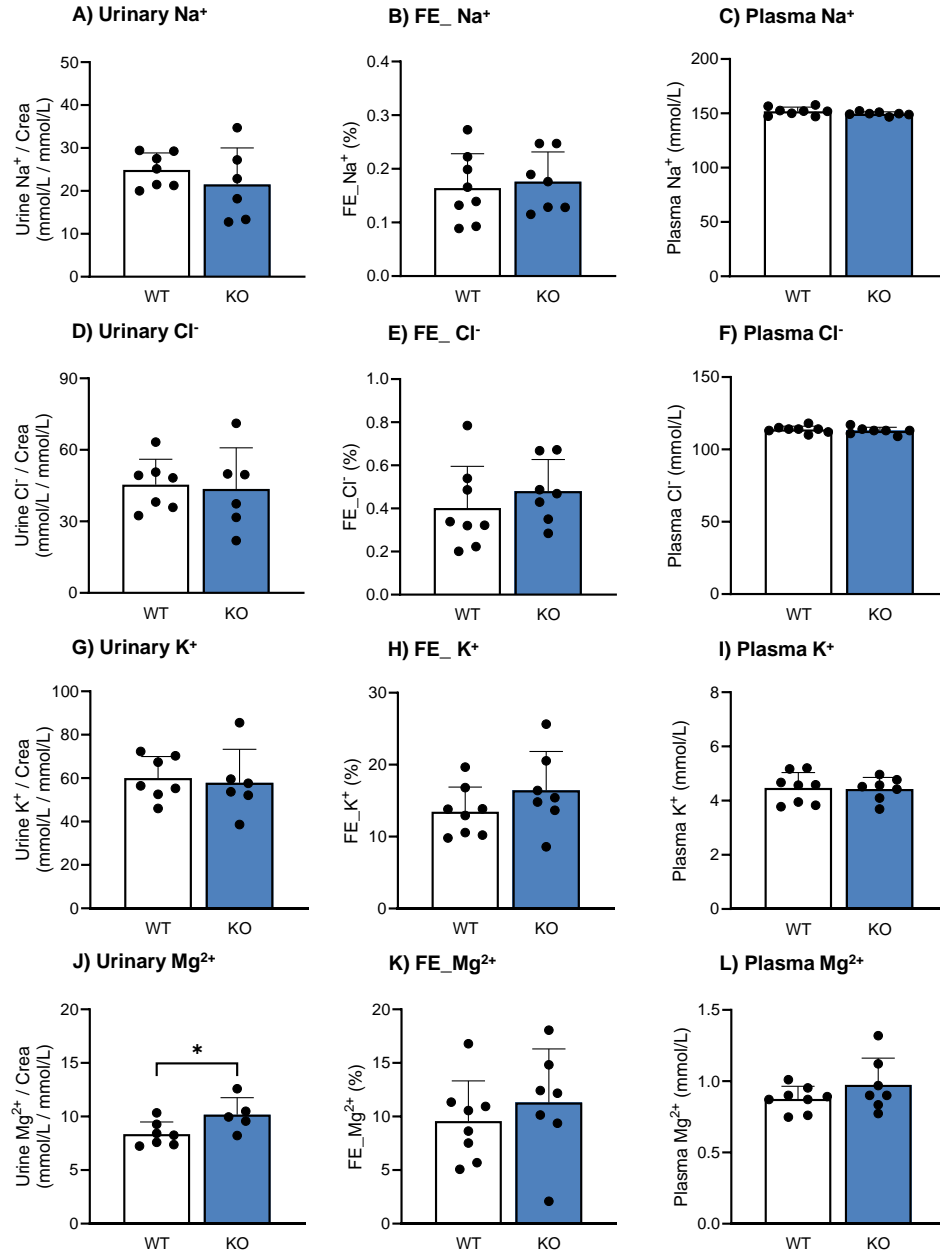

Supplementary figure 3 – mineral parameters under HP conditions

□ WT  
■ KO

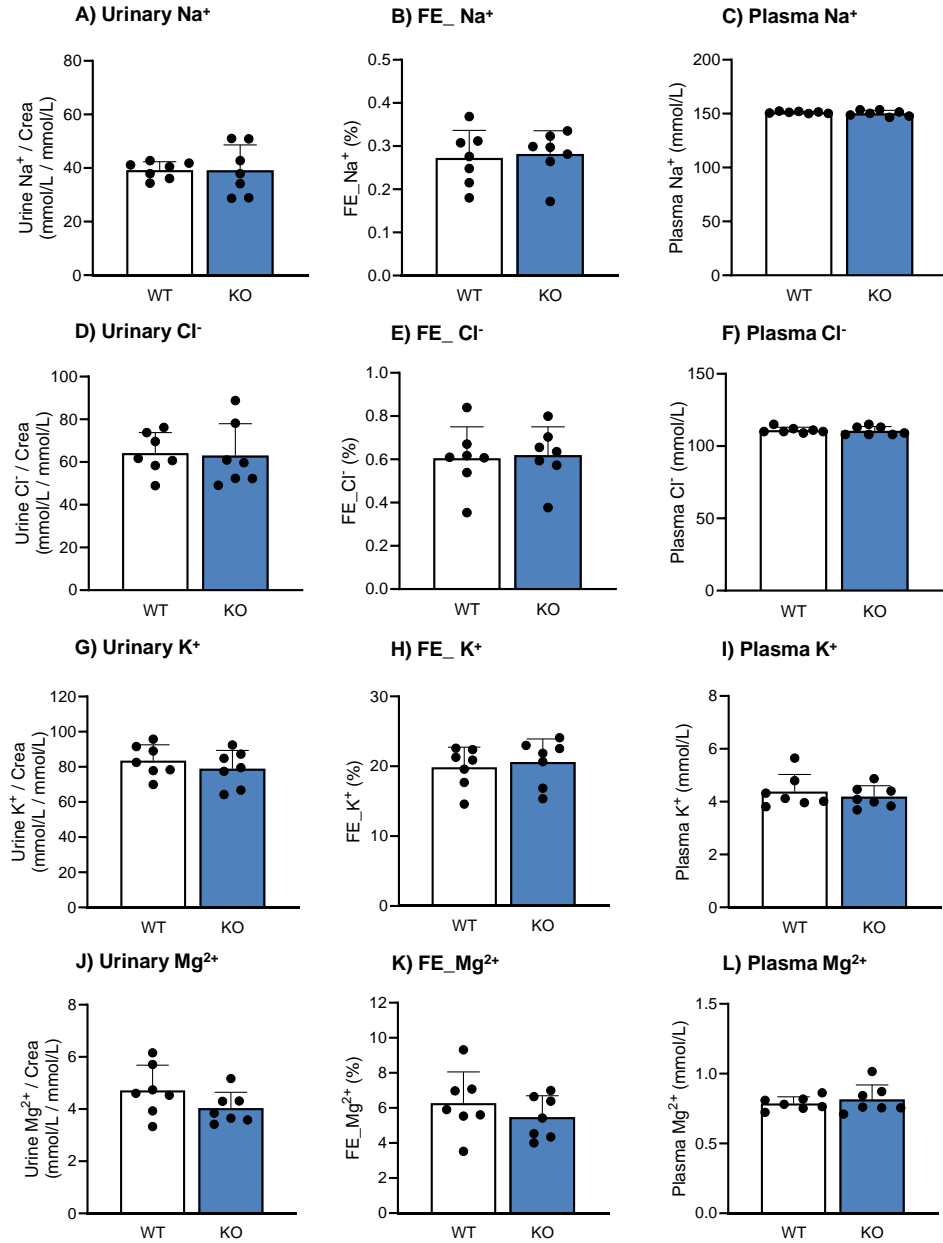

□ WT  
■ KO

Supplementary figure 4 – Jejunal relative permeabilities upon HP diet

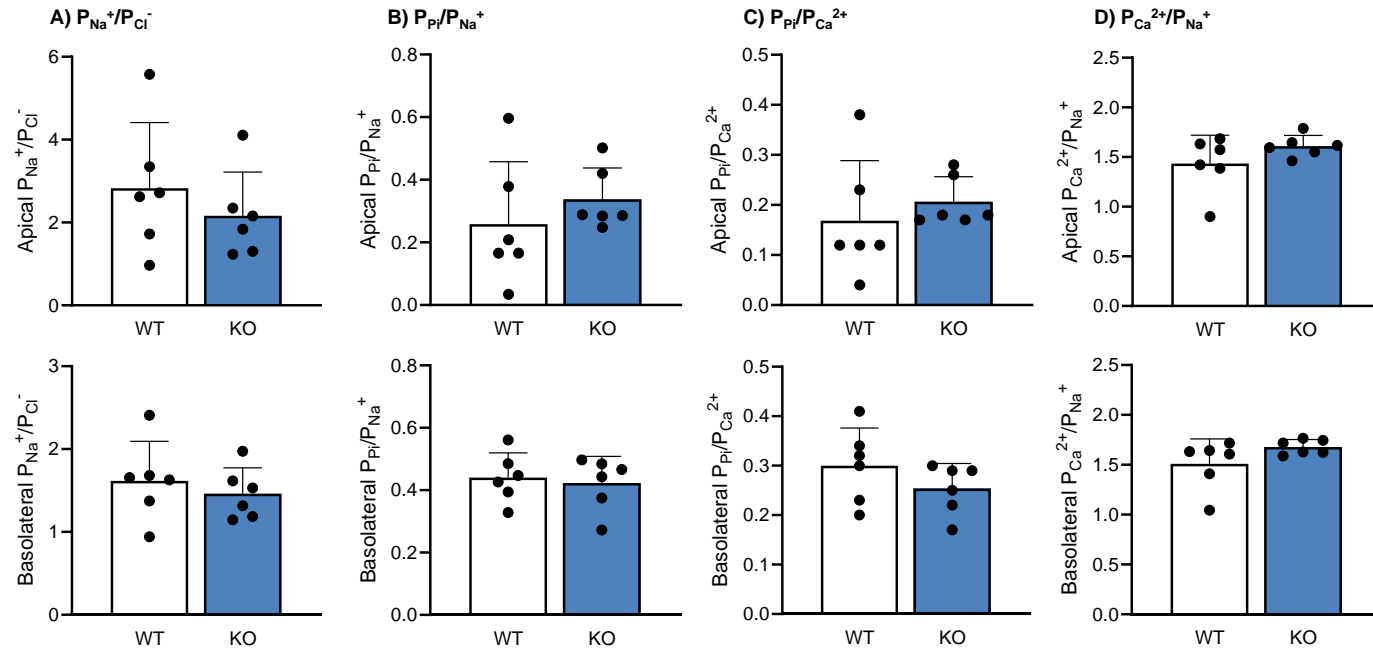

□ WT  
■ KO

Supplementary figure 5 – Ileal relative permeabilities upon HP diet

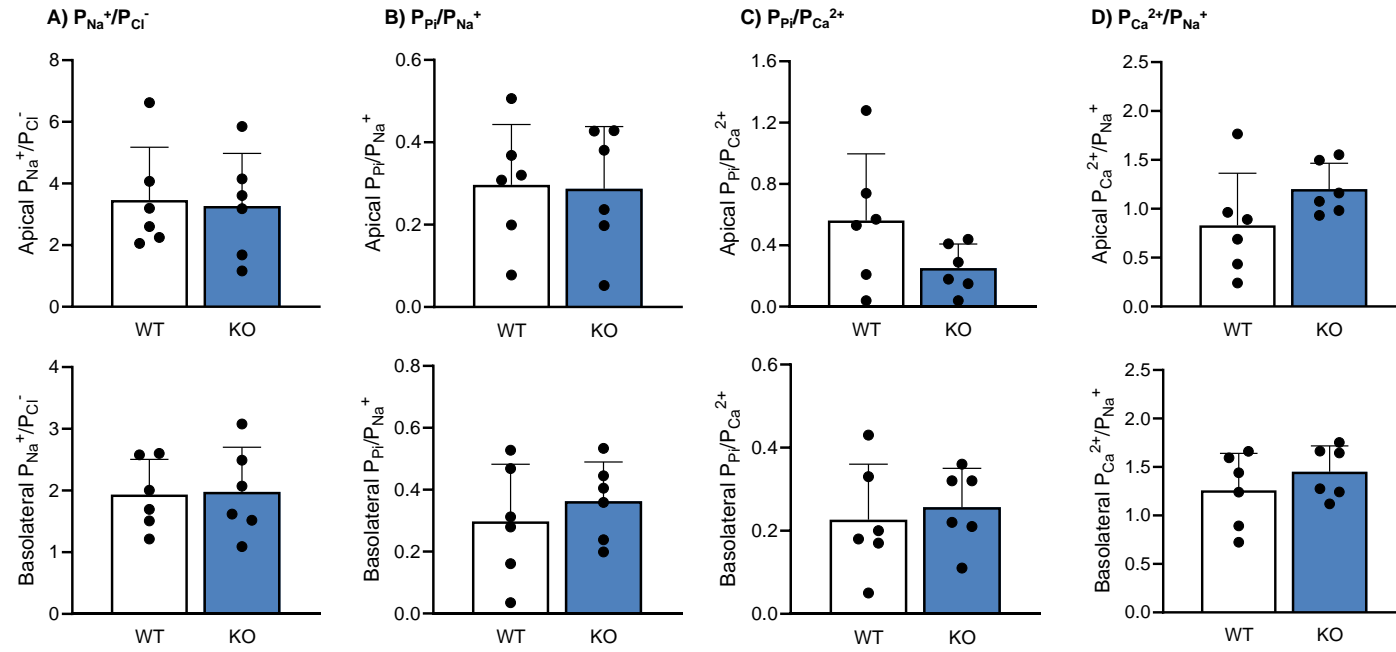

□ WT  
■ KO

Supplementary figure 6 – HP diet jejunal protein expression

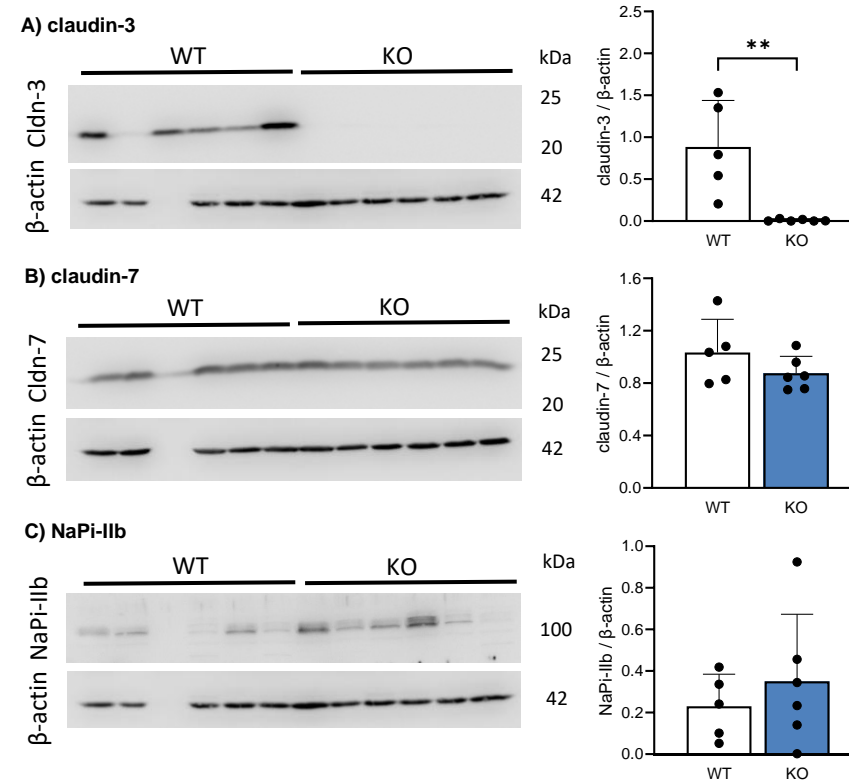



Supplementary figure 7. Intestinal expression of Cldn3 and Cldn7 proteins in WT and *Cldn3* deficient mice

Jejunum

Ileum

wildtype

*Cldn3* knockout

wildtype

*Cldn3* knockout

Cldn3

Cldn3

Cldn7

Cldn7

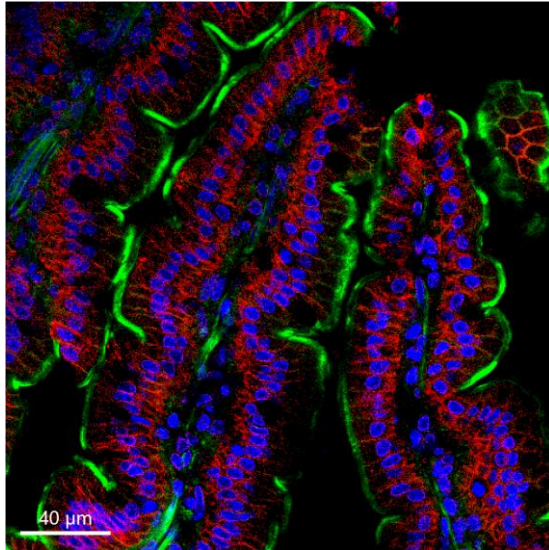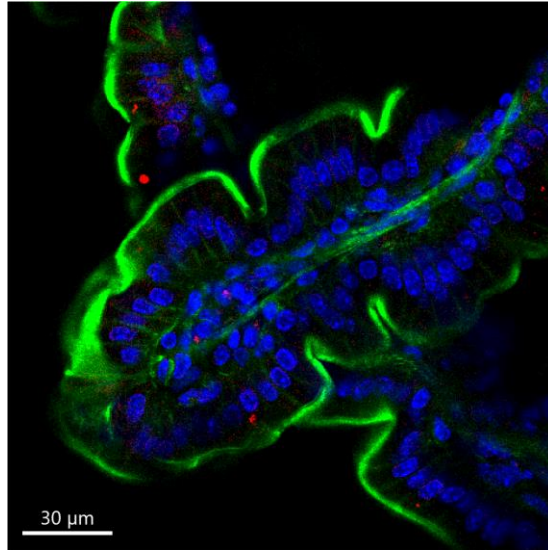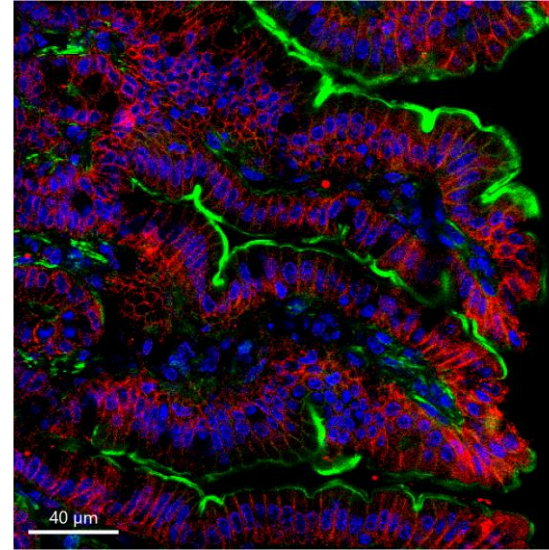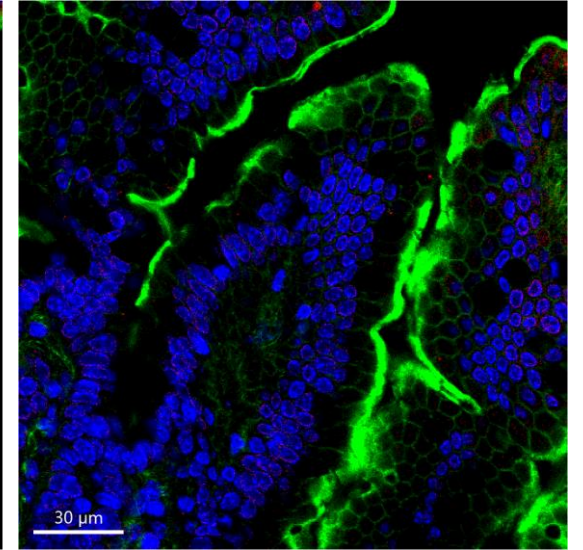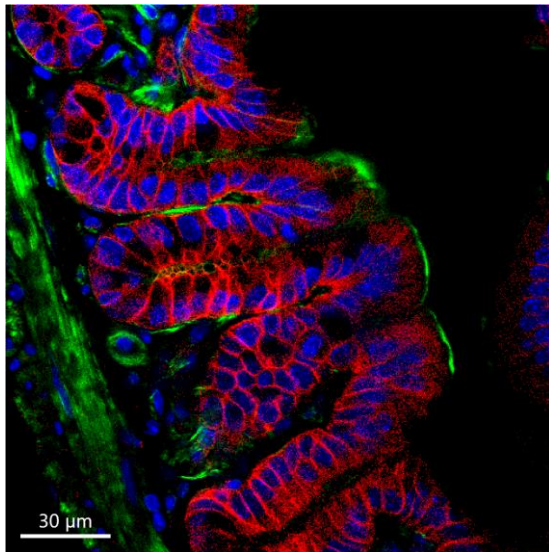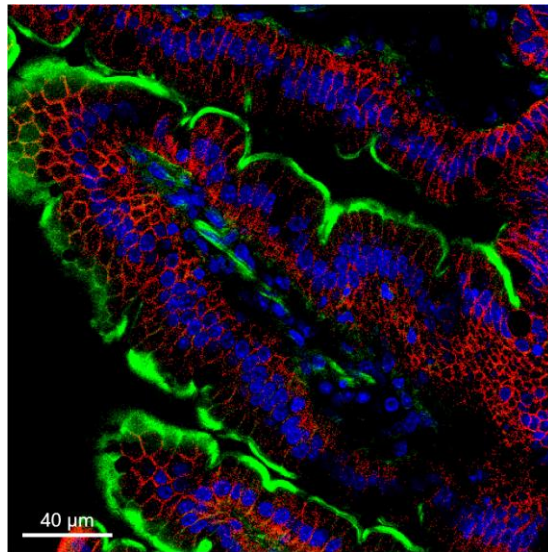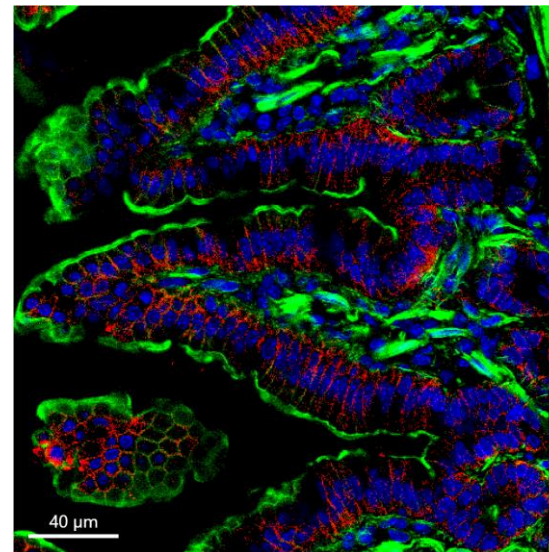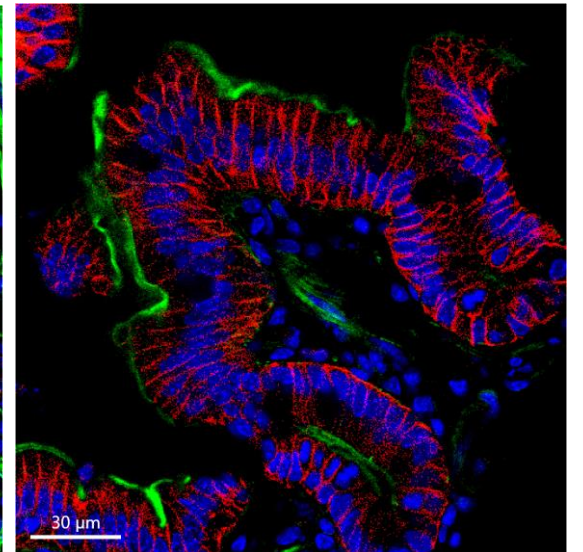



□ WT  
■ KO

Supplementary figure 8 – renal protein expression

A) NaPi-IIa – baseline

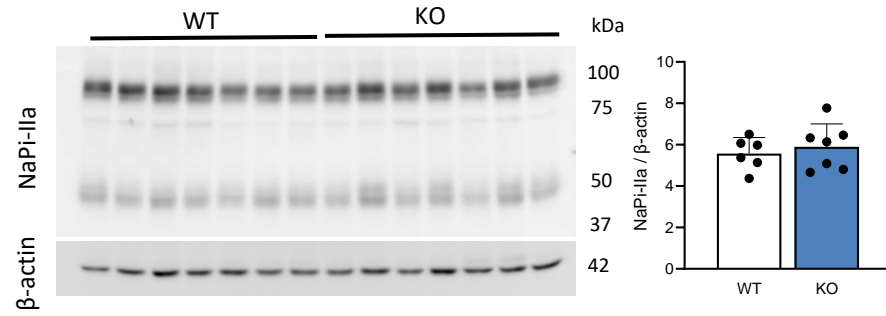

B) NaPi-IIa – HP diet

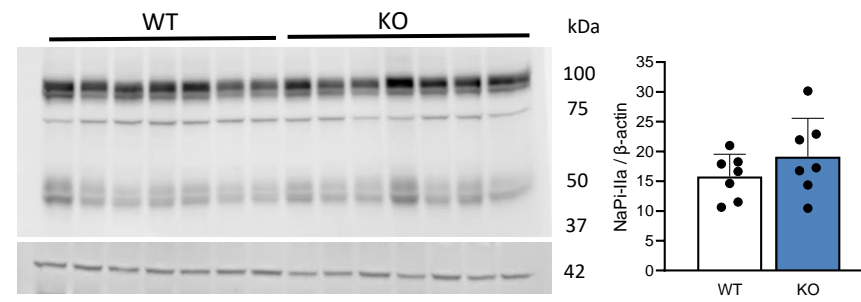

□ WT  
■ KO

Supplementary figure 9 – HP diet jejunal and ileal protein expression

A) calbindin-D28k - jejunum

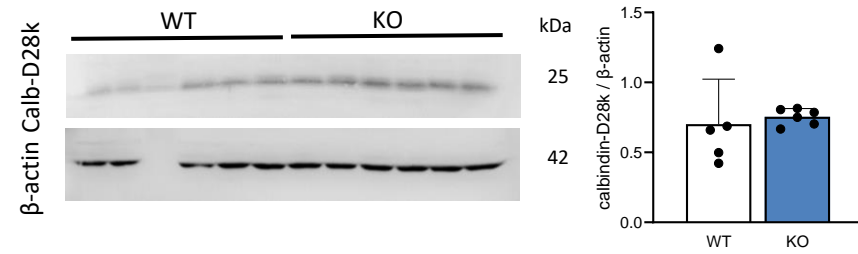

B) calbindin-D28k - ileum

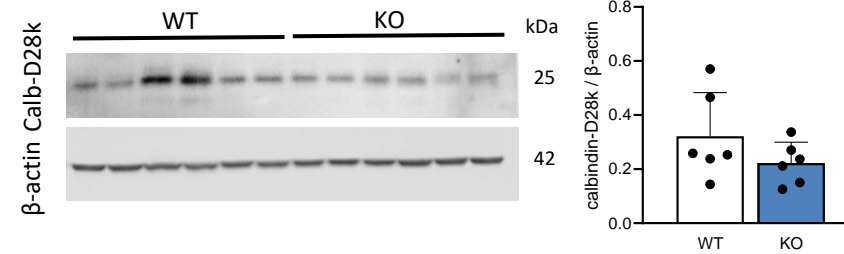

□ WT  
■ KO

Supplementary figure 10 – jejunal gene expression under baseline and HP conditions

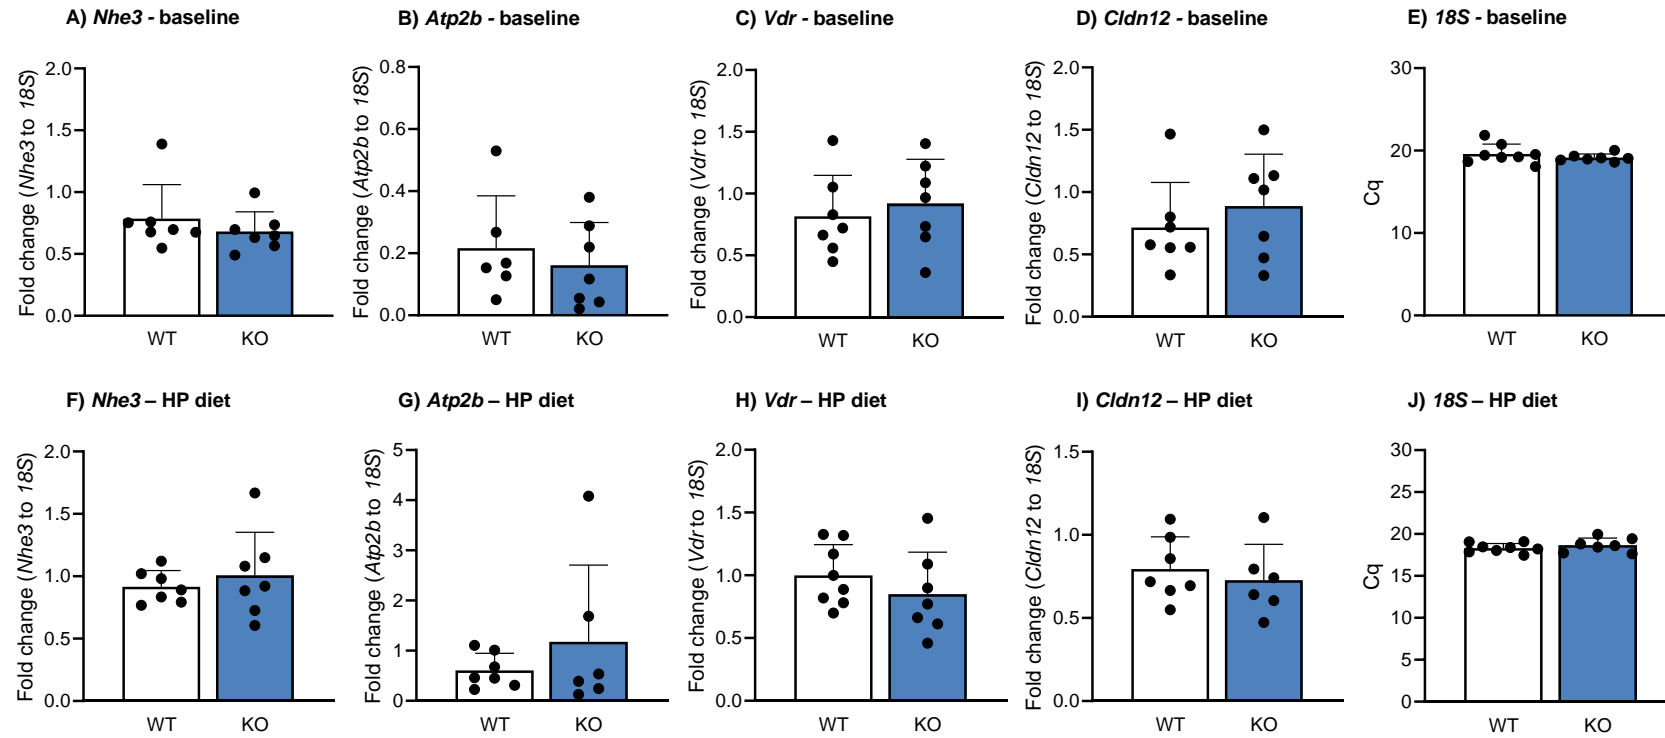

Supplement: 424_2024_2998_MOESM1_ESM.pdf [file 424_2024_2998_MOESM1_ESM.pdf]
